# Supplementary material
Source: HighWire-hosted journal article supplement (https://mbio.asm.org/content/8/5/e01067-17)
Supplement: inline-supplementary-material-5 [file inline-supplementary-material-5.pdf]

**Table S1.** Plasmids.

| Plasmid                            | Features                                                                                                                               | Marker           | Source/Reference              |
|------------------------------------|----------------------------------------------------------------------------------------------------------------------------------------|------------------|-------------------------------|
| pQE30                              | <i>E. coli</i> vector for the expression of hexa-His-tagged recombinant proteins                                                       | Amp <sup>R</sup> | Qiagen                        |
| pQE30::rFnBPB(163-480)             | pQE30 derivative encoding the N2N3 subdomain of FnBPB from <i>S. aureus</i> 8325-4                                                     | Amp <sup>R</sup> | FEBS J. (2011) 278, 2359-2371 |
| pQE30::rFnBPB(163-463)             | pQE30 derivative encoding residues 163-463 of FnBPB from <i>S. aureus</i> 8325-4                                                       | Amp <sup>R</sup> | FEBS J. (2011) 278, 2359-2371 |
| pQE30::rFnBPB(163-480) N312A/F314A | pQE30 derivative encoding the N2N3 subdomain of FnBPB from <i>S. aureus</i> 8325-4 with mutations encoding the changes N312A and F314A | Amp <sup>R</sup> | FEBS J. (2011) 278, 2359-2371 |
| pQE30::rFnBPB(163-308)             | pQE30 derivative encoding the N2 subdomain of FnBPB from <i>S. aureus</i> 8325-4                                                       | Amp <sup>R</sup> | JBC (2016) 291, 18148-18162   |
| pQE30::rFnBPB(309-480)             | pQE30 derivative encoding the N3 subdomain of FnBPB from <i>S. aureus</i> 8325-4                                                       | Amp <sup>R</sup> | JBC (2016) 291, 18148-18162   |
| pQE30::rFnBPA(194-511)             | pQE30 derivative encoding the N2N3 subdomain of FnBPA from <i>S. aureus</i> 8325-4                                                     | Amp <sup>R</sup> | This study                    |
| pQE30::rFnBPA(194-336)             | pQE30 derivative encoding the N2 subdomain of FnBPB from <i>S. aureus</i> 8325-4                                                       | Amp <sup>R</sup> | This study                    |
| pQE30::rFnBPA(337-511)             | pQE30 derivative encoding the N3 subdomain of FnBPB from <i>S. aureus</i> 8325-4                                                       | Amp <sup>R</sup> | This study                    |

Amp<sup>R</sup>: ampicillin resistance
